## Effect of habitual reading direction on saccadic eye movements

A Lyu <sup>a,b</sup> (BSc, MSc), L Abel <sup>b,c</sup> (PhD), AMY Cheong <sup>a</sup> (PhD, BSc (Hons))

<sup>a</sup> School of Optometry, The Hong Kong Polytechnic University, Hong Kong

<sup>b</sup> Department of Optometry and Vision Sciences, University of Melbourne, Australia

<sup>c</sup> School of Medicine, Faculty of Health, Deakin University, Australia

**Correspondence's Address:** Allen MY Cheong

School of Optometry, The Hong Kong Polytechnic University,  
Hung Hom, Hong Kong

Telephone: 852-2766-6108

Facsimile: 852-2764-6051

Electronic mail: [allen.my.cheong@polyu.edu.hk](mailto:allen.my.cheong@polyu.edu.hk)

Number of tables: 2

Number of figures: 4

Journal submission: Plos One

Date of 1<sup>st</sup> submission: 10<sup>th</sup> Jan 2022

### ***Contributions of authors to the article:***

- Anqi Lyu: Experimental design, data collection, analysis and manuscript writing.
- Larry Abel and Allen Cheong are supervisors of Anqi Lyu (postgraduate student). We involved in experimental design, data analysis and manuscript writing.

Email correspondence of authors:

- Lyu A: [an-qi.lyu@connect.polyu.hk](mailto:an-qi.lyu@connect.polyu.hk)
- Abel L: [larry.abel@deakin.edu.au](mailto:larry.abel@deakin.edu.au)
- Cheong AMY: [allen.my.cheong@polyu.edu.hk](mailto:allen.my.cheong@polyu.edu.hk)

## Abstract

Cognitive processes can influence the characteristics of saccadic eye movements. Reading habits, including habitual reading direction, also affects cognitive and visuospatial processes, favouring attention to the side where reading begins. Few studies have investigated the effect of habitual reading direction on saccade directionality of low-cognitive-demand stimuli (such as dots). The current study examined horizontal prosaccade, antisaccade and self-paced saccade in subjects with two primary habitual reading directions. We hypothesised that saccades responding to the target in subject's habitual reading direction would show a longer prosaccade latency and lower antisaccade error rate (errors being a reflexive glance to a sudden-appearing target, rather than a saccade away from it). Sixteen young Chinese participants with primary habitual reading direction from left to right and sixteen young Arabic and Persian participants with primary habitual reading direction from right to left were recruited. Subjects needed to look towards a  $5^\circ$  /  $10^\circ$  target in the prosaccade task or look towards the mirror image location of the target in the antisaccade task and look between two 10-degree targets in the self-paced saccade task. Only Arabic and Persian participants showed a shorter and directional prosaccade latency towards  $5^\circ$  target against their habitual reading direction. No significant effect of primary reading direction on antisaccade latency towards the correct directions was found. However, we found that Chinese readers generated significantly shorter prosaccade latencies and higher antisaccade directional errors compared with Arabic and Persian readers. The present study provides an insight into the effect of reading habits on saccadic eye movements in response to low-cognitive-demand stimuli and offers a platform for future studies to investigate the relationship between reading habits and neural mechanisms of eye movement behaviours.

# 1 **1. Introduction**

## 2 **1.1 Saccadic eye movements**

3           Humans do not look at a scene with steady gaze. Our eyes move around, bringing the  
4 interesting parts of the scene to the fovea with the frequency of 2 or 3 fixations per second  
5 [1]. In fact, saccadic eye movement is one of the fastest movements produced by the human  
6 body, serving in bringing the images of objects of interest into central vision for detailed  
7 analysis. The perception of the environment relies on saccades and fixations which are the  
8 stops in-between saccades [2]. A distributed network including cortical (mainly frontal and  
9 parietal) and subcortical (basal ganglion, superior colliculus, midbrain, brain stem, thalamus  
10 and cerebellum) areas are involved in generating saccades [3]. It has been suggested that  
11 understanding the saccadic system provides researchers a valuable “microcosm of the brain”  
12 as its input can be controlled and manipulated, while its output can be accurately recorded  
13 and quantified using different experimental paradigms [4]. A range of eye movement tasks  
14 have been used in the literature to examine the characteristics of saccades, including  
15 prosaccade, antisaccade and self-paced saccade tasks. Prosaccades, which are also known as  
16 reflexive saccades, test the response time (latency) and accuracy of a saccade (saccade gain in  
17 terms of the ratio of saccade amplitude / target amplitude) to a sudden-onset peripheral visual  
18 stimulus. An antisaccade requires the suppression of a reflexive saccade towards a sudden-  
19 onset stimulus and the execution of a voluntary saccade to the opposite direction of the  
20 stimulus. The parallel nature of antisaccade programming assumes a competition arises  
21 between the exogenously triggered prosaccade and the endogenously initiated antisaccade at  
22 the onset of stimulus [5-7]. For example, if the exogenously triggered prosaccade is  
23 programmed too fast (or the endogenously initiated antisaccade is too slow to reach the  
24 threshold for activation), it “wins” the competition and make a reflexive saccade first (i.e.,

25 antisaccade directional error), followed by a corrective antisaccade [8]. Directional error rate  
26 (i.e., the proportion of glances towards the stimulus) and the latency of correct response are  
27 commonly analysed in antisaccade task. Self-paced saccade task has been considered as an  
28 almost entirely volitional eye movement task that requires repetitive and self-initiated  
29 refixations between two static visual stimuli [9].

30 Poor performance in saccadic eye movement has been demonstrated in various  
31 neurological and psychiatric disorders [10], such as schizophrenia [11], attention-deficit  
32 hyperactivity disorder (ADHD) [12-14], Parkinson's disease [3, 15, 16] and depression [17].  
33 In particular, a vast array of studies have suggested that many cognitive processes, including  
34 those involved in attention [18-20], working memory [21] and learning [22], have an impact  
35 on the characteristics of saccadic eye movements.

## 36 **1.2 Effect of cognitive process on saccadic eye movement**

37 Attention is needed to orient the target location prior to the execution of a saccade  
38 [20]. Saslow reported a decrease in prosaccade latency from 200 msec to 150 msec if the  
39 stimulus appeared 200 msec or longer after the termination of the fixation, compared to the  
40 situation where the offset of fixation and onset of stimulation occurred simultaneously [23].  
41 By introducing a medium temporal gap (200 – 250 msec) between the offset of a central  
42 fixation target and the onset of a peripheral stimulus, Fischer and Weber found a significant  
43 decrease in antisaccade latency but a significant increase in antisaccade error rate [18]. One  
44 explanation for these changes in saccades was that this temporal gap contributed to the  
45 disengagement of attention before the target appeared. Moreover, studies manipulating the  
46 likelihood of the target presenting on either left or right side of a central fixation point found  
47 that subjects showed shorter prosaccade latency to the target direction with a higher  
48 probability of presentation. This suggested an effect of learning in modifying the prosaccade  
49 performance [22, 24].

50           While changing the direction of letters and words within English sentences (i.e., both  
51 letters and words were orientated from right to left), Inhoff et al. reported less efficient  
52 saccadic eye movements in English readers compared with their reading normal English  
53 texts. However, these performances improved with practice [25]. In addition to these studies,  
54 extensive findings have revealed a wide range of cognitive processes influencing saccadic  
55 eye movements [18-20]. Even a simple prosaccade involves a complex weighting of both  
56 bottom-up information (stimulus properties) and top-down information (cognitive factors),  
57 although the precise nature for the degrees of the control remains unclear [8]. In addition, our  
58 cognitive systems are shaped or influenced by cultural practices such as reading habits (see  
59 below of section 1.3), which suggests the impact of reading habits on characteristics of  
60 saccadic eye movements.

### 61 **1.3 Effect of habitual reading direction on cognitive systems**

62           Han and Northoff (2008a) provided neuroimaging evidence that transcultural  
63 differences could affect the neural activities underlying both high-level and low-level  
64 cognitive functions [26]. They proposed to investigate the influence of reading direction on  
65 regulating the functional organization of the human brain as well as related neurocognitive  
66 processes [27]. Reading direction has been found to influence many cognitive functions, such  
67 as directional differences in facial expression perception [28], aesthetic preference [29] and  
68 utilization of visual space [30]. Especially, visuospatial attention can be modulated by the  
69 habitual reading direction. During a letter matching task, English readers with habitual  
70 reading direction of left-to-right (LTR) spent a longer time in responding to the stimulus in  
71 the right visual field, while Hebrew readers with habitual reading direction of right-to-left  
72 (RTL) took longer to respond to the stimulus that appeared in the left visual field. They  
73 suggested that reflexive attention showed biases on the side where reading began [31].  
74 Consistent with this study, several studies have confirmed the effect of habitual reading

75 direction on the asymmetries of visuospatial attention [32-34]. For example, Rinaldi and  
76 colleagues (2014) compared the performance on a star cancellation task between Italian and  
77 Israeli subjects who were instructed to mark the small stars amongst many randomly  
78 distributed distractors (large stars, English or Hebrew letters and words). They found that  
79 monolingual Italian subjects (i.e., reading from LTR) made more omissions in the right visual  
80 field, while monolingual Israeli subjects (i.e., reading from RTL) omitted more targets in the  
81 left visual field [33]. However, bilingual subjects who managed reading in both directions did  
82 not show any spatial asymmetries. Further, Afsari and colleagues (2016) examined the effect  
83 of habitual reading direction in bilingual readers of a native LTR language and a secondary  
84 RTL language. They found that native LTR readers who studied a secondary RTL language  
85 in late life showed a leftward bias with more fixations on the left part of a natural image, and  
86 this horizontal bias of the exploration of images did not alter when they first read either LTR  
87 or RTL text primes [34].

88 In addition to the biased visuospatial attention, we questioned whether reading  
89 direction also contributed to the left-right asymmetry of saccadic eye movements. While  
90 reading continuous text, LTR texts such as English [35] and German [36] elicit saccades  
91 towards the location slightly to the left of a word centre, while RTL scripts such as Hebrew  
92 [37] and Uighur [38] have saccades landing to the position slightly to the right of a word  
93 centre. In addition to saccades generated towards to the left and right directions, Yan et al.  
94 took the advantage that Chinese text can be orientated horizontally and vertically without  
95 disturbing the shape of characters and reported a similar saccadic landing position for 28  
96 young readers reading horizontal and vertical Chinese texts [39]. These studies demonstrated  
97 that reading direction affected saccadic eye movements during high-level reading processes.  
98 Nevertheless, fewer studies have investigated the impact of the habitual reading direction on  
99 the directionality of saccadic eye movements during low-cognitively demanded tasks such as

100 responding to a dot. Most of the studies investigating the left-right asymmetry of these  
101 saccadic eye movements focused on ocular dominance [40-42] or hand dominance [43, 44].  
102 Understanding the effect of habitual reading direction on saccadic eye movements of low-  
103 cognitive-demand stimuli would help researchers to better investigate the differences of eye  
104 movement control across populations.

105         In the present study, young healthy participants with two primary habitual reading  
106 directions were recruited to complete 3 types of saccadic eye movement tasks, namely  
107 horizontal prosaccade, antisaccade and self-paced saccade. These encompassed both  
108 reflexively and volitionally initiated saccades. We hypothesized that readers who habitually  
109 read from LTR should show a leftward asymmetry in the saccadic parameters (i.e., shorter  
110 prosaccade latency and higher antisaccade error rate) when they made a saccade responding  
111 to the target appeared in the direction where reading began (i.e., the target appeared at the left  
112 of a fixation point) compared with the target appeared along their habitual reading direction  
113 (i.e., the target appeared at the right of the fixation point). In contrast, readers who habitually  
114 read from RTL would show a rightward asymmetry.

## 115 **2. Material and methods**

### 116 **2.1 Subjects**

117         32 young university students who were bilingual speakers and readers were recruited  
118 from the University of Melbourne (20) and The Hong Kong Polytechnic University (16). The  
119 calculated sample size provided 85% power to detect a significant difference (an estimated  
120 effect size of 0.71) between the 2 reading directions of 5° stimulus at the one-tailed 0.05  
121 alpha level. 16 subjects were Chinese readers whose primary reading direction was LTR and  
122 16 Arabic and Persian readers (12 Arabic and 4 Persian) whose primary reading direction  
123 was RTL. All participants were aged between 18 and 35 with normal or corrected to normal

124 vision and started to learn English (with reading direction of LTR) since their early  
125 childhoods. To control the potential confounding influence of education level, this factor was  
126 controlled and matched between these 2 groups. Participants in the RTL group were  
127 significantly older than the LTR group. Nevertheless, horizontal saccade latency is relatively  
128 stable from age of 14 to 50 years old [45], so this factor should not be a concern. Exclusion  
129 criteria were any history of ophthalmic, neurological or psychotic illness, or any medications  
130 intake that might affect eye movements. Subjects were separated into 2 groups according to  
131 their primary habitual reading direction. The characteristics of the participants are shown in  
132 Table 1. Informed consent was obtained in accordance with a protocol approved by the  
133 University of Melbourne human research ethics committee (HREC #1647981.1) and  
134 Department of Research Committee of the School of Optometry of The Hong Kong  
135 Polytechnic University (HSEARS20191217001). The study followed the tenets of the  
136 Declaration of Helsinki.

137 **Table 1**      **Descriptive characteristics of participants**

|                                     | Chinese participants<br>(N =16) | Arabic (N = 12) and Persian<br>(N = 4) participants | P-value |
|-------------------------------------|---------------------------------|-----------------------------------------------------|---------|
| Habitual reading<br>direction       | From left to right (LTR)        | From right to left (RTL)                            |         |
| Age (y)<br>mean (SD)                | 23.8 (3.4)                      | 27.1 (3.8)                                          | 0.02    |
| range (y)                           | 19 - 32                         | 18 - 34                                             |         |
| English education<br>(y), mean (SD) | 16.8 (3.3)                      | 16.6 (6.4)                                          | 0.89    |
| range (y)                           | 10 - 21                         | 6 - 30                                              |         |

## 139 **2.2 Apparatus and stimuli**

140 As the data were collected at 2 sites, minor differences of experimental setting were  
141 present, including presenting monitor and testing distance, whereas the stimulus size and



142 distance were adjusted so that same visual angle was elicited. Both the testing sequence and  
143 program (including resolution and refresh rate) were identical between the 2 sites. The  
144 stimulus was a 1-degree black dot against a white background on a 27-inch (U2711B, Dell  
145 Technologies, Round Rock, Texas, United States) or a 24-inch LCD monitor (BENQ xl2540)  
146 in Melbourne and Hong Kong site respectively. Participants sat comfortably at 75 cm  
147 (Melbourne) or 65 cm (Hong Kong) in front of the monitor with chin resting on a chinrest to  
148 stabilize their head position. Movement of both eyes was recorded using an infrared video  
149 eye tracking system (Eyelink 1000 or Eyelink Portable Duo, SR Research, Scarborough,  
150 ONT, Canada) with a sampling rate of 500 Hz. The resolution and refresh rate of the  
151 monitors were 1920 x 1080 pixels and 60 Hz. Subjects were asked to perform the following  
152 eye movement tasks.

### 153 **2.3 Procedures**

154 Participants' eye movements were assessed while conducting 3 visual tasks: 1)  
155 prosaccade, 2) antisaccade and 3) self-paced saccade tasks.

156 Targets were presented pseudorandomly in locations 5 or 10 degrees to the left or  
157 right of the centre of the monitor. Participants were instructed to fixate at a centre cross and  
158 then to look towards the target in the prosaccade task (see Fig. 1a) or look towards the mirror  
159 image of the target in the antisaccade task (see Fig. 1b) as soon as the target was presented  
160 and fixation disappeared. Fifty-two trials were conducted in the prosaccade task to assess the  
161 prosaccade latency (i.e., reaction time responding to the onset of stimulus) and gain (i.e., ratio  
162 of saccadic amplitude to target amplitude). Express saccades whose latency falls between 80  
163 to 120 msec [46-48] were excluded from the analysis. Less than 15 % of the trials were  
164 excluded for all participants. Fifty-two trials were conducted in the antisaccade task to assess  
165 the antisaccade latency of correct responses (i.e., saccades made to the correct direction) and  
166 error rate (i.e., proportion of prosaccade errors). In the self-paced saccade task, two targets

167 were shown for 45 seconds at 10 degrees left and right of the centre of the monitor.  
168 Participants needed to look back and forth between these two dots as rapidly and as  
169 accurately as possible for the entire duration of the task. Gain (i.e., ratio between the primary  
170 saccade and target amplitude) and inter-saccadic intervals (i.e., interval between onset of the  
171 saccades) were collected and submitted to data analysis.

## 172 **Fig. 1 Sample trial of prosaccade and antisaccade task**

*Fig. 1a. A sample trial of prosaccade task when participants need to make a saccade towards the target as quickly as possible.*

*Fig. 1b. A sample trial of antisaccade task when participants need to look at the mirror image of the target location as quickly as possible.*

## 173 **2.4 Data analysis**

174 All statistical analysis was performed using GraphPad Prism version 9.2.0.332 for  
175 Windows (GraphPad Software, San Diego, California USA, [www.graphpad.com](http://www.graphpad.com)). Eye  
176 movement parameters were not significantly different from normal distribution  
177 (Kolmogorov-Smirnov goodness of fit test,  $p > 0.05$ ). Dependent variables (prosaccade  
178 latency, prosaccade gain, correct antisaccade latency, antisaccade error rate, inter-saccadic  
179 interval, and gain in self-paced saccades) were analysed using analysis of variance (ANOVA)  
180 with group (LTR (Chinese participants) vs. RTL (Arabic and Persian participants)) as  
181 between-subject factors and the direction of stimulus (with- vs. against habitual reading  
182 direction) and / or the magnitude of stimulus from the fixation ( $5^\circ$  vs.  $10^\circ$ ) as within-subject  
183 factors, to assess any significant effect or interaction. A p-value of less than 0.05 was  
184 considered statistically significant.

## 185 **3. Results**

### 186 **3.1 Effects of habitual reading direction on prosaccade eye**

#### 187 **movements**

188 The average prosaccade latency of the RTL group in response to a sudden-onset  
189 stimulus was significantly longer than that of the LTR group (mean 188.06 vs. 174.41 msec,  
190  $F(1,60)=5.61$ ,  $p=0.02$ ). Bonferroni's post-hoc analysis demonstrated that RTL participants  
191 required longer prosaccade latency in responding to targets presented at  $5^\circ$  along their  
192 habitual reading direction compared with LTR participants (198.98 vs. 167.75 msec,  $p=0.01$ ).  
193 Neither stimulus direction (i.e., presented with- or against-reading direction) or magnitude  
194 (i.e., presented at  $5^\circ$  or  $10^\circ$  away from fixation) had a significant effect on prosaccade latency  
195 ( $F(1,60)<1.59$ ,  $p>0.21$ ), whereas a significant interaction between group and stimulus  
196 direction was observed ( $F(1,60) = 8.07$ ,  $p=0.006$ ). The RTL participants had longer  
197 prosaccade latency when the target was presented  $5^\circ$  along their habitual reading direction  
198 (i.e., target at the left side of the fixation) compared with that appeared against the reading  
199 direction (198.98 vs. 178.77 msec,  $p=0.03$ ). However, LTR participants showed similar  
200 reaction time for the target appearing towards the two directions (167.75 vs. 176.56 msec,  
201  $p>0.99$ ; Table 2).

202 Prosaccade gain examines the accuracy of the landing position of prosaccade. Neither  
203 of the three independent variables (i.e., group, stimulus direction and stimulus magnitude)  
204 significantly affected the gain ( $F(1,60)<2.15$ ,  $p>0.15$ ). Nevertheless, similar to the latency  
205 result, a significant interaction between group and stimulus direction was found  
206 ( $F(1,60)=6.93$ ,  $p=0.01$ ). Although no significance was found in the post-hoc analysis (Table  
207 2).

208  
209

**Table 2** Eye movement characteristics in the prosaccade and antisaccade task (mean and standard deviation)

| Group              |                                           |                           |                           | <i>Chinese participants<br/>(N = 16) (LTR)</i> | <i>Arabic (N = 12) and Persian<br/>(N = 4) participants (RTL)</i> | <i>P-value</i> |  |
|--------------------|-------------------------------------------|---------------------------|---------------------------|------------------------------------------------|-------------------------------------------------------------------|----------------|--|
| Saccade type       |                                           | <i>Stimulus magnitude</i> | <i>Stimulus direction</i> |                                                |                                                                   |                |  |
| <b>Prosaccade</b>  | <b>Prosaccade<br/>latency<br/>(msec)</b>  | 5°                        | With-direction            | <b>167.75 (22.06)</b>                          | <b>198.98 (31.76)</b>                                             | <b>0.01*</b>   |  |
|                    |                                           |                           | Against-direction         | 176.56 (24.64)                                 | <b>178.77 (23.86)</b>                                             | >0.99          |  |
|                    |                                           | <i>P-value</i>            |                           | >0.99                                          | <b>0.03*</b>                                                      |                |  |
|                    |                                           | 10°                       | With-direction            | 176.00 (17.91)                                 | 190.33 (29.32)                                                    | >0.99          |  |
|                    | Against-direction                         |                           | 177.36 (36.82)            | 184.15 (19.11)                                 | >0.99                                                             |                |  |
|                    | <i>P-value</i>                            |                           | >0.99                     | >0.99                                          |                                                                   |                |  |
|                    | <b>Prosaccade<br/>gain</b>                | 5°                        | With-direction            | 1.02 (0.12)                                    | 0.96 (0.10)                                                       | >0.99          |  |
|                    |                                           |                           | Against-direction         | 0.98 (0.08)                                    | 1.03 (0.23)                                                       | >0.99          |  |
| <i>P-value</i>     |                                           | >0.99                     | 0.16                      |                                                |                                                                   |                |  |
| 10°                |                                           | With-direction            | 0.99 (0.08)               | 0.94 (0.08)                                    | >0.99                                                             |                |  |
|                    | Against-direction                         | 0.97 (0.05)               | 0.95 (0.11)               | >0.99                                          |                                                                   |                |  |
| <i>P-value</i>     |                                           | >0.99                     | >0.99                     |                                                |                                                                   |                |  |
| <b>Antisaccade</b> | <b>Antisaccade<br/>latency<br/>(msec)</b> | 5°                        | With-direction            | 285.73 (45.18)                                 | 277.74 (46.70)                                                    | >0.99          |  |
|                    |                                           |                           | Against-direction         | 287.11 (38.79)                                 | 276.90 (45.08)                                                    | >0.99          |  |
|                    |                                           | <i>P-value</i>            |                           | >0.99                                          | >0.99                                                             |                |  |
|                    |                                           | 10°                       | With-direction            | 285.96 (30.69)                                 | 273.05 (51.56)                                                    | >0.99          |  |
| Against-direction  | 280.21 (33.69)                            |                           | 275.84 (45.50)            | >0.99                                          |                                                                   |                |  |
| <i>P-value</i>     |                                           | >0.99                     | >0.99                     |                                                |                                                                   |                |  |

210

\*:  $p < 0.05$

## 211 **3.2 Effects of habitual reading direction on antisaccade eye** 212 **movements**

213 Opposite to the findings in prosaccade eye movements, there was no significant main  
214 effect or interaction effect of group, stimulus direction and stimulus magnitude on the  
215 antisaccade latency for the correct trials ( $F(1,60) < 0.82$ ,  $p > 0.37$ ; Table 2).

216 When comparing antisaccade errors between different groups and among different  
217 stimulus positions, stimulus magnitude (i.e.,  $5^\circ$  vs.  $10^\circ$ ) was found to significantly affect the  
218 rate of directional errors ( $F(1,60) = 9.25$ ,  $p = 0.004$ ), that both groups made more antisaccade  
219 errors towards  $5^\circ$  targets compared with  $10^\circ$  targets (rate of 0.24 vs. 0.17 and 0.24 vs. 0.10 for  
220 the LTR and RTL group respectively; Fig. 2). A significant interaction between group and  
221 stimulus direction (i.e., with- vs. against-reading direction) was observed ( $F(1,60) = 6.92$ ,  
222  $p = 0.01$ ), that the LTR group marginally had more antisaccade errors for targets appearing  $10^\circ$   
223 away from the centre at their habitual reading side, compared with the RTL group (rate of  
224 0.22 vs. 0.07,  $p = 0.05$ ).

### 225 **Fig. 2 Antisaccade error rate in 2 groups of participants**

226 *The antisaccade error rate of the Chinese (left panel) as well as the Arabic and Persian*  
227 *group (right panel) in responding to the  $5^\circ$  and  $10^\circ$  with-direction target was  $0.25 \pm 0.18$  and*  
228  *$0.22 \pm 0.18$ , and  $0.20 \pm 0.19$  and  $0.07 \pm 0.09$ , respectively, and those for against direction*  
229 *target was  $0.23 \pm 0.21$  and  $0.12 \pm 0.15$ , and  $0.27 \pm 0.21$  and  $0.14 \pm 0.15$  respectively.*  
230 *Bars are mean value and standard deviation.*

## 231 **3.3 Relationship between prosaccade and antisaccade** 232 **performance**

233 Further analysis was performed to examine the impact of type of saccade (prosaccade  
234 vs. antisaccade) on saccade latency. Interestingly, Chinese participants (LTR group) tended

235 to have shorter prosaccade (174.42 vs. 188.06 msec) but longer antisaccade latency (284.75  
236 vs. 275.88 msec) than the Arabic and Persian participants (RTL group), although this did not  
237 reach significance ( $F(1, 60)=3.74, p=0.06$ ) (see Fig. 3).

238 **Fig. 3 Prosaccade latency and correct antisaccade latency of Chinese (LTR) as well as**  
239 **Arabic and Persian group (RTL)**

240 *Mean prosaccade latency for the Chinese as well as the Arabic and Persian groups was*  
241 *174.42 and 188.06 msec respectively, while the mean of correct antisaccade latency was*  
242 *284.75 and 275.88 msec respectively.*

### 243 **3.4 Effects of habitual reading direction on self-paced saccadic** 244 **eye movements**

245 Inter-saccadic interval and gain was compared between groups and directions of self-  
246 paced saccades (i.e., saccades towards habitual reading direction vs. towards non-habitual  
247 reading direction) as well as the interaction effect. No significant group or direction effect  
248 was found on interval ( $F(1,30)<0.14, p>0.71$ ; mean of 509.77 vs. 514.57 msec in the Chinese  
249 group and 512.55 vs. 514.29 msec in the Arabic and Persian group for saccades made  
250 towards habitual and non-habitual reading direction respectively).

251 However, a significant interaction between group and saccadic direction was observed  
252 on self-paced saccade gain ( $F(1,30)=14.37, p<0.001$ ; see Fig. 4). The Chinese group showed  
253 more accurate gain when they made a saccade to the dot located at the side of their habitual  
254 reading direction (i.e., the dot at the right of the monitor) compared with the dot located in  
255 their non-habitual reading direction (mean 1.01 vs. 0.95,  $p=0.02$ ). Whereas participants in the  
256 Arabic and Persian group generated more accurate saccades towards the dot showing along  
257 their non-habitual reading direction (i.e., dot at the right side of the centre of the monitor)  
258 (1.01 vs. 0.96,  $p=0.03$ ).

259 **Fig. 4 Self-paced saccade gain in Chinese (LTR) as well as the Arabic and Persian**  
260 **group (RTL)**

261 *The mean of self-paced saccade gain for the Chinese as well as the Arabic and Persian*  
262 *groups made towards the dot showing at their habitual reading direction was 1.01 and 0.96*  
263 *respectively, while that made towards the dot located at the side of their non-habitual*  
264 *reading direction was 0.95 and 1.01 respectively.*

265 \*:  $p < 0.05$

266 **4. Discussion**

267 The objective of this study was to evaluate the impact of the primary habitual reading  
268 direction on the directionality of saccadic eye movements to low-cognitive-demand stimuli in  
269 young and healthy Chinese as well as Arabic and Persian participants using prosaccade,  
270 antisaccade and self-paced tasks. One of the major findings was the significantly shorter  
271 saccade latency of the Chinese participants whose primary habitual reading direction was  
272 from left to right (LTR) in the prosaccade task compared with that of the Arabic and Persian  
273 participants whose primary habitual reading direction was from right to left (RTL). However,  
274 the effect of reading direction on the antisaccade latency disappeared, where participants in  
275 both groups had similar latencies of accurate antisaccade. The second major finding was that  
276 the Chinese subjects generated marginally but significantly more directional errors compared  
277 with the Arabic and Persian subjects when the target appeared at  $10^\circ$  along their habitual  
278 reading direction in the antisaccade task.

279 **4.1 Impact of habitual reading direction on prosaccade latency**

280 In this study, we hypothesized that participants would produce shorter prosaccade  
281 latency to a stimulus which appeared in their non-habitual reading direction (i.e., left for the  
282 Chinese participants and right for the Arabic and Persian participants). This was, however,

283 only found in the Arabic and Persian participants in responding to the 5° target. Previous  
284 studies reported that the direction of the stimulus presentation did not significantly affect the  
285 prosaccade latency of young participants, although previous studies did not consider the  
286 participants' reading direction [41, 49]. In addition, our study found that Chinese readers had  
287 16% shorter prosaccade latency than Arabic and Persian readers when target appeared 5°  
288 along their habitual reading direction. Amaty et al. reported that Chinese participants  
289 generated more low latency 'express saccades' compared to non-Chinese participants  
290 (Caucasian participants) in an overlap prosaccade task [50]. Their study argued that this  
291 difference in saccade latency should be attributed to human genetic diversity rather than  
292 cultural differences, as those Chinese participants who grew up in the UK also showed the  
293 same pattern of saccade latency as the participants lived in mainland China [51]. A similar  
294 study by Knox and colleagues evaluated the antisaccade performance of Chinese participants  
295 and found a significantly higher antisaccade directional error rate in those Chinese  
296 participants who exhibited a higher proportion of express saccades [52]. They suggested that  
297 there was a difference in neurophysiological substrate concerned with eye movement that  
298 was not associated with culture. Nevertheless, in addition to express saccade latency, few  
299 studies have demonstrated the difference in normal reflexive saccades with both top-down  
300 and bottom-up control between populations. An electrophysiological study in primates  
301 showed that a neural signal took around 40 msec to be transmitted from the retina to the  
302 superior colliculus (SC), and it took approximately 20 msec to stimulate the SC to trigger a  
303 saccadic eye movement to a specific location [53]. However, the typical latency of a  
304 prosaccade is around 200 msec in humans [8]. Carpenter argued that such a long latency of  
305 the saccadic eye movement was due to the decision time on making a decision to look at the  
306 target or not [54]. One possible explanation for the different reaction time across groups was  
307 that these two groups' participants used different decision-making strategies, resulting in



308 different decision-making times. However, further study is required to investigate the  
309 decision-making time for simple cognitive tasks between different populations.

310 It has been suggested that attention needs to orient to the target location prior to the  
311 execution of the saccade [20]. Pollatsek and colleagues measured the perceptual span in  
312 bilingual Israeli readers who spoke English as their second language. They found that  
313 bilingual Israeli readers showed an asymmetry perceptual span that extended 14 characters to  
314 the left of fixation and 4 characters to the right while reading Hebrew [55]. Additionally,  
315 although no overall extent of the perceptual span was examined, Jorden et al., reported a  
316 leftward asymmetry in perceptual span when participants read Arabic [56]. McConkie and  
317 Rayner reported that skilled readers of English and other alphabetic languages reading from  
318 left to right showed an asymmetric perceptual span, extending 14-15 characteristics to the  
319 right of fixation and 3-4 characteristics to the left [57]. In contrast, Chinese readers showed a  
320 narrower perceptual span that extended 1 character space leftward and 3 characters spaces  
321 rightward as reported in Inhoff and Liu [58] or extended beyond 4 characters spaces  
322 rightward depending on the font size as reported in Yan et al. [59]. It is possible that the early  
323 disengagement of attention in Chinese participants leads to a reduction in prosaccade latency  
324 because the 5° targets in the present study exceed the perceptual span used to acquire useful  
325 information by Chinese participants (the size of each character in [58] study was 0.9°), but  
326 still fall into the perceptual span of the Arabic and Persian participants. Accordingly, the  
327 Arabic and Persian group showed a directional difference of prosaccade latency whereas no  
328 group difference was found for the 10° target away from the centre.

## 329 **4.2 Impact of habitual reading direction on prosaccade gain**

330 Inconsistent with other studies [44, 60, 61], we did not find a significant gain  
331 difference with respect to stimulus magnitude. One possible explanation could be the  
332 different perceptual span of the 2 groups of the participants. Therefore, hypometric

333 performance towards a 5° target disappeared when we combined the 2 groups together. A  
334 significant interaction between group and stimulus direction was found in prosaccade gain.  
335 Although Arabic and Persian subjects made more accurate prosaccade towards the side of  
336 their non-habitual reading direction (i.e., right side of the fixation), Chinese participants also  
337 performed similarly that target at the right side elicited more accurate prosaccades. This  
338 finding was consistent with the result as reported in (Vergilino-Perez et al., 2012) that  
339 rightward prosaccade had larger amplitude. Nevertheless, no primary habitual reading  
340 direction effect was found on prosaccade gain.

### 341 **4.3 Impact of habitual reading direction on antisaccade latency**

342 The current result agreed with previous findings where the latency of a correct  
343 horizontal antisaccade was independent of stimulus direction or magnitude [44, 62, 63].  
344 Although different eye movement paradigms (overlap and gap conditions) were tested on  
345 different participant cohorts, the latency of the correct antisaccades did not show the same  
346 pattern as the prosaccades. The study reported by Knox et al. also revealed that the correct  
347 antisaccade latency was identical between Chinese participants who exhibited a high  
348 proportion of express saccades and those who did not [52]. Reading relies more on  
349 perceptually driven saccades [64]. In contrast, cognition is needed to inhibit the reflexive  
350 error that was stimulated by a perceptual stimulus in the antisaccade task [8]. Therefore, the  
351 possibility that the cognitive difference induced by subjects' habitual reading habits had  
352 greater influence on reflexive saccades compared to volitional saccades. That is, reaction  
353 time of a reflexive saccade was more impacted by reading direction than initiation time of an  
354 antisaccade. Therefore, the correct antisaccade latency was not significantly affected by the  
355 habitual reading direction or the direction of the stimulus.

#### 356 **4.4 Impact of habitual reading direction on antisaccade error** 357 **rate**

358 The antisaccade error rate was found to be significantly higher in the Chinese group  
359 compared with the Arabic and Persian group for the 10° with-direction stimulus presentation,  
360 although shorter prosaccade latency was observed in the Chinese group when the target  
361 appeared 5° along their habitual reading direction. Previous study showed that prosaccade  
362 training increased the number of antisaccade errors, because the reinforcement of the practice  
363 made it harder to inhibit a reflexive glance. Accordingly, subjects who were trained on  
364 antisaccade eye movement significantly reduced their directional errors [65]. The Arabic and  
365 Persian participants in the present study were familiar with reading in both directions, the  
366 inhibition of reading in the opposite direction during one language processing might improve  
367 their ability to suppress reflexive saccades, which resulted in significantly fewer number of  
368 errors. Although Arabic and Persian participants had shorter prosaccade latency towards their  
369 non-habitual reading direction side, they did not show higher antisaccade error rate, or more  
370 antisaccade errors towards the right side. This implies that this quicker prosaccade latency  
371 was not fast enough to make more antisaccade errors.

#### 372 **4.5 Impact of habitual reading direction on self-paced saccades**

373 The self-paced saccade task has been considered as an almost entirely volitional eye  
374 movement task as no reflexive cues are presented to trigger saccadic eye movements [9]. The  
375 generation of self-paced saccades requires a series of quick volitional engagements and  
376 disengagements of attention between 2 static stimuli. Although it has been proposed that  
377 language processing drives the disengagement and shift of attention to the next word of  
378 interest in the direction of reading [66], the current result failed to find a difference in the  
379 mean inter-saccadic interval between the self-paced saccades initiated to the side of subjects'

380 habitual reading direction and those to the non-habitual reading direction in both groups. One  
381 possible explanation is that the amplitude of the saccades required to execute the self-paced  
382 saccade task is much larger than those produced during normal reading, thus the difference  
383 was not shown in the current ocular motor task. Alternatively, it is possible that the subjects'  
384 sustained task engagement was more relevant to the performance of the self-paced saccade  
385 task, compared to the attentional modulation, as a result of the need to continuously initiate  
386 and execute eye movements [67]. Therefore, inter-saccadic interval was not significantly  
387 different between groups. However, both groups' participants showed more accurate gain  
388 when they made a self-paced saccade towards the right target. This result was similar with  
389 the prosaccades, where participants had more accurate gain when the target appeared at the  
390 right side.

#### 391 **4.6 Limitations of the study**

392 At present, very few studies have investigated the differences in saccadic eye  
393 movements in response to a low-cognitive demand target between populations or individuals  
394 from different cultural backgrounds. The analysis of this study has been primarily  
395 concentrated on the effect of the habitual reading direction on the directionality of saccadic  
396 eye movements. However, only the Arabic and Persian subjects who made prosaccade to a 5°  
397 target supported our hypothesis, Nevertheless, we would like to point out several limitations  
398 in the current experiment. First, we did not recruit monolingual Arabic or Persian  
399 participants. The lack of monolingual subjects who only read from right to left leads to an  
400 uncertainty about the impact of habitual reading direction on saccadic eye movements as the  
401 Arabic and Persian participants in the present study were experienced in reading both  
402 directions. Secondly, we did not recruit participants in addition to Chinese who habitually  
403 read from left to right (such as in an alphabetic language such as English). Therefore, it is  
404 difficult to examine if some differences in the current study were due to the culture or reading

405 habit differences. Finally, the current study had a relatively small sample size, limiting the  
406 generalizability of our result. However exploratory, this study offers some insights into the  
407 neural activities of oculomotor behaviours among different cultures. Further study can be  
408 performed on a large-scale cohort.

## 409 **5. Conclusions**

410 In the current study, we aimed to find the effect of the primary habitual reading  
411 direction on the directionality of the characteristics of saccadic eye movements in healthy  
412 Chinese as well as Arabic and Persian participants using prosaccade, antisaccade and self-  
413 paced tasks. We hypothesised that participants showed shorter prosaccade latency and a  
414 higher antisaccade error rate when a stimulus was presented at the side of their non-habitual  
415 reading direction. Our hypotheses were partially accepted, with significantly shorter  
416 prosaccade latency found in the Arabic and Persian participants in responding to the 5°  
417 rightward target. The present study may contribute to the investigation of the neural  
418 mechanisms of oculomotor behaviours between populations.

419 **Declarations of interest:** none.

## 420 **References**

- 421 1. Carpenter RHS. The neural control of looking. *Curr Biol.* 2000;10(8):R291-3.
- 422 2. Irwin DE. Information integration across saccadic eye movements. *Cogn Psychol.*  
423 1991;23(3):420-56.
- 424 3. Pretegianni E, Optican LM. Eye Movements in Parkinson's Disease and Inherited  
425 Parkinsonian Syndromes. *Front Neurol.* 2017;8:592.
- 426 4. Carpenter RHS. Frontal cortex. Choosing where to look. *Curr Biol.* 1994;4(4):341-3.
- 427 5. Hutton SB, Ettinger U. The antisaccade task as a research tool in psychopathology: a  
428 critical review. *Psychophysiology.* 2006;43(3):302-13.

- 429 6. Massen C. Parallel programming of exogenous and endogenous components in the  
430 antisaccade task. *Q J Exp Psychol A*. 2004;57(3):475-98.
- 431 7. Munoz DP, Everling S. Look away: the anti-saccade task and the voluntary control of  
432 eye movement. *Nat Rev Neurosci*. 2004;5(3):218-28.
- 433 8. Hutton SB. Cognitive control of saccadic eye movements. *Brain Cogn*.  
434 2008;68(3):327-40.
- 435 9. Abel LA, Douglas J. Effects of age on latency and error generation in internally  
436 mediated saccades. *Neurobiol Aging*. 2007;28(4):627-37
- 437 10. Bittencourt J, Velasques B, Teixeira S, Basile LF, Salles JI, Nardi AE, et al. Saccadic  
438 eye movement applications for psychiatric disorders. *Neuropsychiatr Dis Treat*. 2013;9:1393-  
439 409.
- 440 11. Broerse A, Crawford TJ, den Boer JA. Parsing cognition in schizophrenia using  
441 saccadic eye movements: a selective overview. *Neuropsychologia*. 2001;39(7):742-56.
- 442 12. Barkley RA. Behavioral inhibition, sustained attention, and executive functions:  
443 constructing a unifying theory of ADHD. *Psychol Bull*. 1997;121(1):65-94.
- 444 13. Gould TD, Bastain TM, Israel ME, Hommer DW, Castellanos FX. Altered  
445 performance on an ocular fixation task in attention-deficit/hyperactivity disorder. *Biol*  
446 *Psychiatry*. 2001;50(8):633-5.
- 447 14. Feifel D, Farber RH, Clementz BA, Perry W, Anllo-Vento L. Inhibitory deficits in  
448 ocular motor behavior in adults with attention-deficit/hyperactivity disorder. *Biol Psychiatry*.  
449 2004;56(5):333-9.
- 450 15. Lezak MD. *Neuropsychological assessment*: Oxford University Press, USA; 2004.
- 451 16. Lemos J, Pereira D, Almendra L, Rebelo D, Patrício M, Castelhana J, et al. Distinct  
452 functional properties of the vertical and horizontal saccadic network in Health and  
453 Parkinson's disease: An eye-tracking and fMRI study. *Brain Res*. 2016;1648(Pt A):469-84.

- 454 17. Winograd-Gurvich C, Georgiou-Karistianis N, Fitzgerald PB, Millist L, White OB.  
455 Ocular motor differences between melancholic and non-melancholic depression. *J Affect*  
456 *Disord.* 2006;93(1-3):193-203.
- 457 18. Fischer B, Weber H. Effects of stimulus conditions on the performance of  
458 antisaccades in man. *Exp Brain Res.* 1997;116(2):191-200.
- 459 19. Liversedge SP, Findlay JM. Saccadic eye movements and cognition. *Trends Cogn*  
460 *Sci.* 2000;4(1):6-14.
- 461 20. Hoffman JE, Subramaniam B. The role of visual attention in saccadic eye movements.  
462 *Percept Psychophys.* 1995;57(6):787-95.
- 463 21. Roberts RJ, Hager LD, Heron C. Prefrontal cognitive processes: Working memory  
464 and inhibition in the antisaccade task. *J Exp Psychol Gen.* 1994;123(4):374.
- 465 22. Dick S, Kathmann N, Ostendorf F, Ploner CJ. Differential effects of target probability  
466 on saccade latencies in gap and warning tasks. *Exp Brain Res.* 2005;164(4):458-63.
- 467 23. Saslow MG. Effects of components of displacement-step stimuli upon latency for  
468 saccadic eye movement. *J Opt Soc Am.* 1967;57(8):1024-9.
- 469 24. Carpenter RHS, Williams ML. Neural computation of log likelihood in control of  
470 saccadic eye movements. *Nature.* 1995;377(6544):59-62.
- 471 25. Inhoff AW, Pollatsek A, Posner MI, Rayner K. Covert attention and eye movements  
472 during reading. *Q J Exp Psychol A.* 1989;41(1):63-89.
- 473 26. Han S, Northoff G. Culture-sensitive neural substrates of human cognition: A  
474 transcultural neuroimaging approach. *Nat Rev Neurosci.* 2008;9(8):646.
- 475 27. Han S, Northoff G. Reading direction and culture. *Nat Rev Neurosci.* 2008;9(12):965.
- 476 28. Vaid J, Singh M. Asymmetries in the perception of facial affect: is there an influence  
477 of reading habits? *Neuropsychologia.* 1989;27(10):1277-87.

- 478 29. Chokron S, De Agostini M. Reading habits influence aesthetic preference. *Brain Res*  
479 *Cogn Brain Res*. 2000;10(1-2):45-9.
- 480 30. Chokron S, Imbert M. Influence of reading habits on line bisection. *Brain Res Cogn*  
481 *Brain Res*. 1993;1(4):219-22.
- 482 31. Eviatar Z. Reading direction and attention: effects on lateralized ignoring. *Brain*  
483 *Cogn*. 1995;29(2):137-50.
- 484 32. Kazandjian S, Chokron S. Paying attention to reading direction. *Nat Rev Neurosci*.  
485 2008;9(12):965-5.
- 486 33. Rinaldi L, Di Luca S, Henik A, Girelli L. Reading direction shifts visuospatial  
487 attention: an Interactive Account of attentional biases. *Acta Psychol (Amst)*. 2014;151:98-  
488 105.
- 489 34. Afsari Z, Ossandón JP, König P. The dynamic effect of reading direction habit on  
490 spatial asymmetry of image perception. *J Vis*. 2016;16(11):8.
- 491 35. Rayner K. Eye guidance in reading: fixation locations within words. *Perception*.  
492 1979;8(1):21-30.
- 493 36. Nuthmann A, Engbert R, Kliegl R. Mislocated fixations during reading and the  
494 inverted optimal viewing position effect. *Vision Res*. 2005;45(17):2201-17.
- 495 37. Deutsch A, Rayner K. Initial fixation location effects in reading Hebrew words. *Lang*  
496 *Cogn Process*. 1999;14(4):393-421.
- 497 38. Yan M, Zhou W, Shu H, Yusupu R, Miao D, Krügel A, et al. Eye movements guided  
498 by morphological structure: evidence from the Uighur language. *Cognition*. 2014;132(2):181-  
499 215.
- 500 39. Yan M, Pan J, Chang W, Kliegl R. Read sideways or not: Vertical saccade advantage  
501 in sentence reading. *Read Writ*. 2019;32(8):1911-26.



- 502 40. Beydagi H, Yilmaz A, Süer C. The effect of direction on saccadic eye movement  
503 parameters. *J Basic Clin Physiol Pharmacol*. 1999;10(1):73-7.
- 504 41. Constantinidis TS, Smyrnis N, Evdokimidis I, Stefanis NC, Avramopoulos D,  
505 Giouzelis I, et al. Effects of direction on saccadic performance in relation to lateral  
506 preferences. *Exp Brain Res*. 2003;150(4):443-8.
- 507 42. Tagu J, Doré-Mazars K, Lemoine-Lardennois C, Vergilino-Perez D. How Eye  
508 Dominance Strength Modulates the Influence of a Distractor on Saccade Accuracy. *Invest*  
509 *Ophthalmol Vis Sci*. 2016;57(2):534-43.
- 510 43. Killgore WD, Yurgelun-Todd DA. Activation of the amygdala and anterior cingulate  
511 during nonconscious processing of sad versus happy faces. *Neuroimage*. 2004;21(4):1215-23.
- 512 44. Vergilino-Perez D, Fayel A, Lemoine C, Senot P, Vergne J, Doré-Mazars K. Are  
513 there any left-right asymmetries in saccade parameters? Examination of latency, gain, and  
514 peak velocity. *Invest Ophthalmol Vis Sci*. 2012;53(7):3340-8.
- 515 45. Irving EL, Steinbach MJ, Lillakas L, Babu RJ, Hutchings N. Horizontal saccade  
516 dynamics across the human life span. *Invest Ophthalmol Vis Sci*. 2006;47(6):2478-84.
- 517 46. Fischer B, Breitmeyer B. Mechanisms of visual attention revealed by saccadic eye  
518 movements. *Neuropsychologia*. 1987;25(1A):73-83.
- 519 47. Fischer B. The preparation of visually guided saccades. *Rev Physiol Biochem*  
520 *Pharmacol*. 1987;106:1-35.
- 521 48. Fischer B, Ramsperger E. Human express saccades: extremely short reaction times of  
522 goal directed eye movements. *Exp Brain Res*. 1984;57(1):191-5.
- 523 49. De Clerck M, Crevits L, Van Maele G. Saccades: is there a difference between right  
524 and left? *Neuroophthalmology*. 2000;24(2):327-30.
- 525 50. Amatya N, Gong Q, Knox PC. Differing proportions of 'express saccade makers' in  
526 different human populations. *Exp Brain Res*. 2011;210(1):117-29.

- 527 51. Knox PC, Wolohan FD. Cultural diversity and saccade similarities: culture does not  
528 explain saccade latency differences between Chinese and Caucasian participants. PLoS One.  
529 2014;9(4):e94424
- 530 52. Knox PC, Amatya N, Jiang X, Gong Q. Performance deficits in a voluntary saccade  
531 task in Chinese "express saccade makers". PLoS One. 2012;7(10):e47688.
- 532 53. Carpenter RHS. Oculomotor procrastination. Eye movements: cognition and visual  
533 perception. Fischer DF, Monty RA, eds. 1981. pp237-46.
- 534 54. Carpenter RHS. Express saccades: is bimodality a result of the order of stimulus  
535 presentation? Vision Res. 2001;41(9):1145-51.
- 536 55. Pollatsek A, Bolozky S, Well AD, Rayner K. Asymmetries in the perceptual span for  
537 Israeli readers. Brain Lang. 1981;14(1):174-80.
- 538 56. Jordan TR, Almabruk AAA, Gadalla EA, McGowan VA, White SJ, Abedipour L, et  
539 al. Reading direction and the central perceptual span: Evidence from Arabic and English.  
540 Psychon Bull Rev. 2014;21(2):505-11.
- 541 57. McConkie GW, Rayner K. The span of the effective stimulus during a fixation in  
542 reading. Percept Psychophys. 1975;17(6):578-86.
- 543 58. Inhoff AW, Liu W. The perceptual span and oculomotor activity during the reading of  
544 Chinese sentences. J Exp Psychol Hum Percept Perform. 1998;24(1):20-34.
- 545 59. Yan M, Zhou W, Shu H, Kliegl R. Perceptual span depends on font size during the  
546 reading of Chinese sentences. J Exp Psychol Learn Mem Cogn. 2015;41(1):209-19.
- 547 60. Ploner CJ, Ostendorf F, Dick S. Target size modulates saccadic eye movements in  
548 humans. Behav Neurosci. 2004;118(1):237-42.
- 549 61. Kapoula Z. Evidence for a range effect in the saccadic system. Vision Res.  
550 1985;25(8):1155-7.

- 551 62. Bell AH, Everling S, Munoz DP. Influence of stimulus eccentricity and direction on  
552 characteristics of pro- and antisaccades in non-human primates. *J Neurophysiol.*  
553 2000;84(5):2595-604.
- 554 63. Fischer B, Biscaldi M, Gezeck S. On the development of voluntary and reflexive  
555 components in human saccade generation. *Brain Res.* 1997;754(1):285-97.
- 556 64. Feng G. Is there a common control mechanism for anti-saccades and reading eye  
557 movements? Evidence from distributional analyses. *Vision Res.* 2012;57:35-50.
- 558 65. Dyckman KA, McDowell JE. Behavioral plasticity of antisaccade performance  
559 following daily practice. *Exp Brain Res.* 2005;162(1):63-9.
- 560 66. Morrison RE. Manipulation of stimulus onset delay in reading: evidence for parallel  
561 programming of saccades. *J Exp Psychol Hum Percept Perform.* 1984;10(5):667.
- 562 67. Azizi E. The influence of playing video games as an attention rehabilitation technique  
563 in patients with traumatic brain injury. Published PhD thesis. University of Melbourne. 2016.

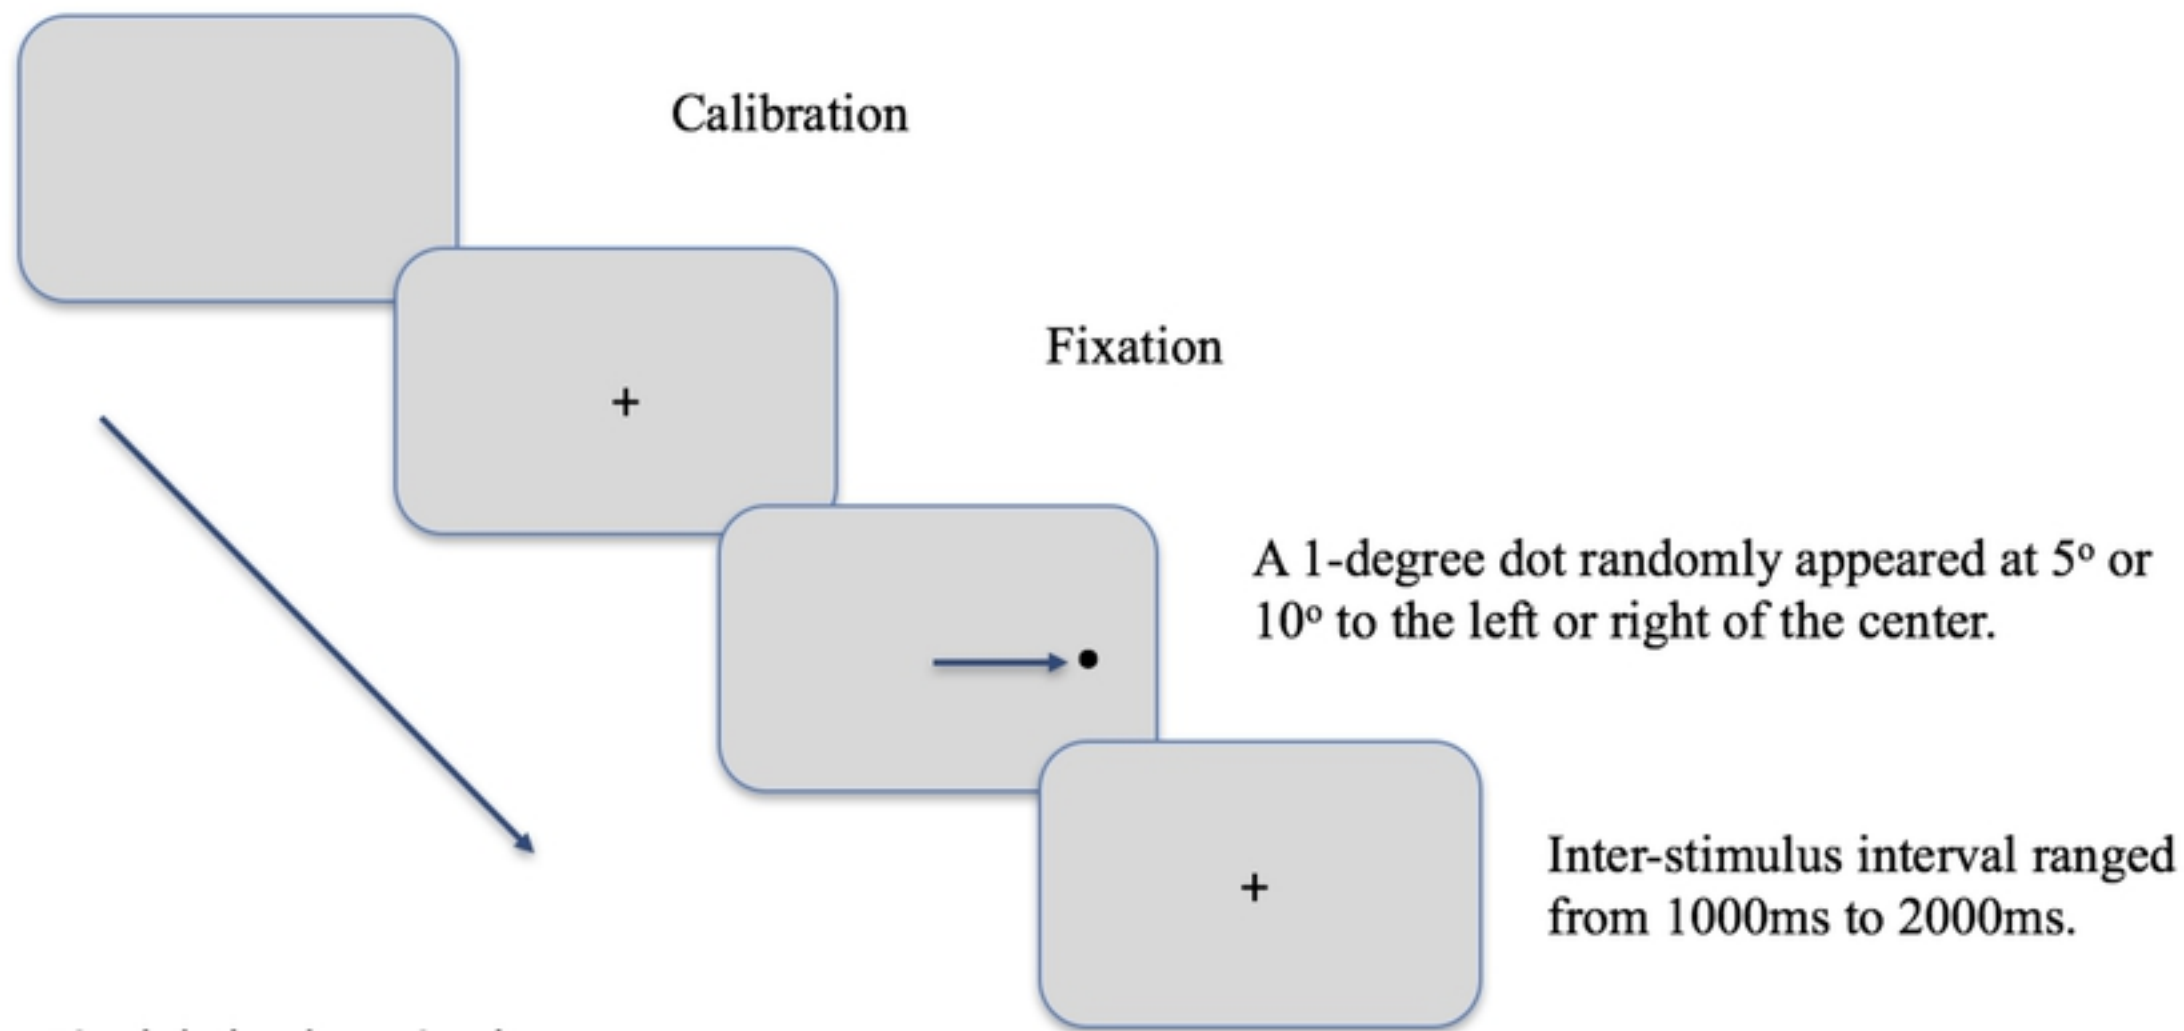

Fig. 1a

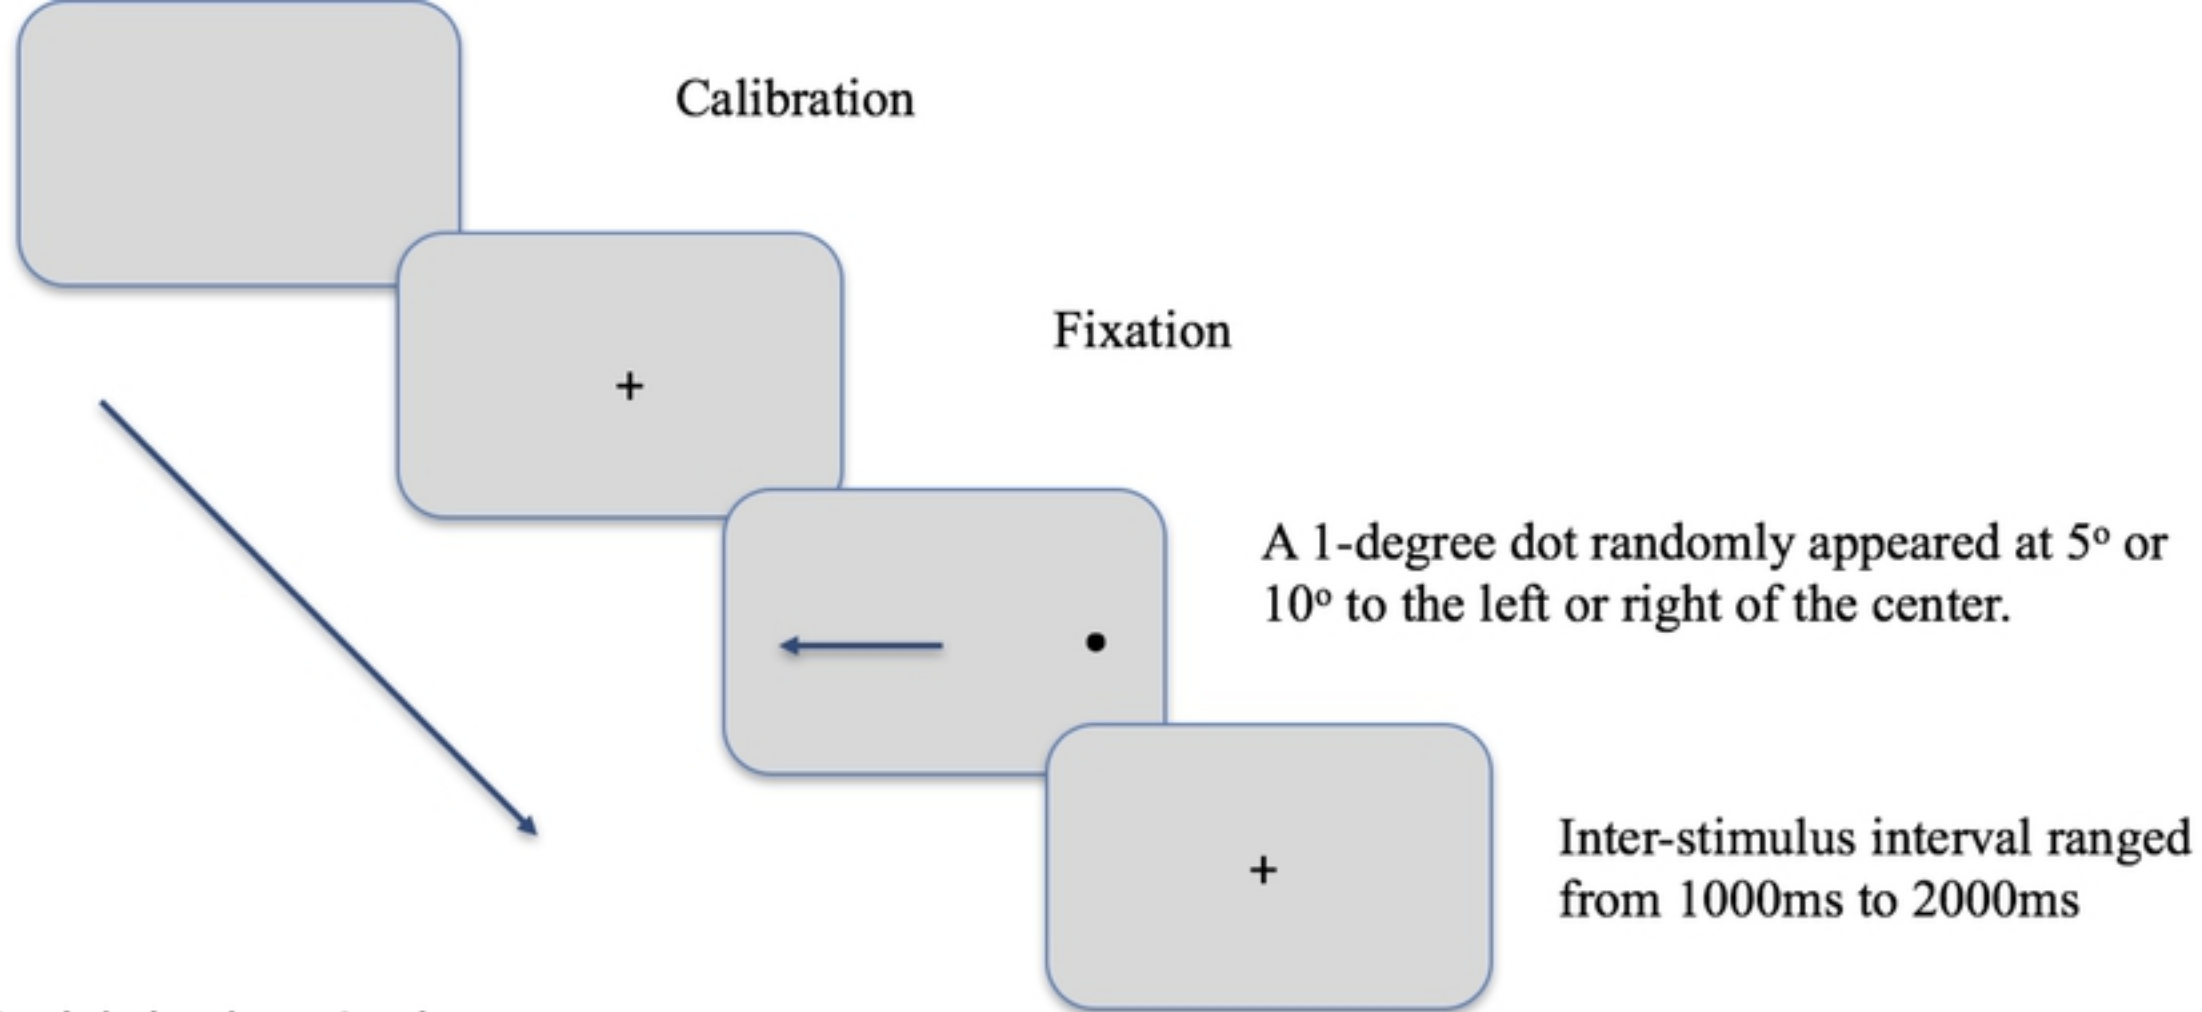

Fig. 1b

# Antisaccade error rate in Chinese (LTR) group

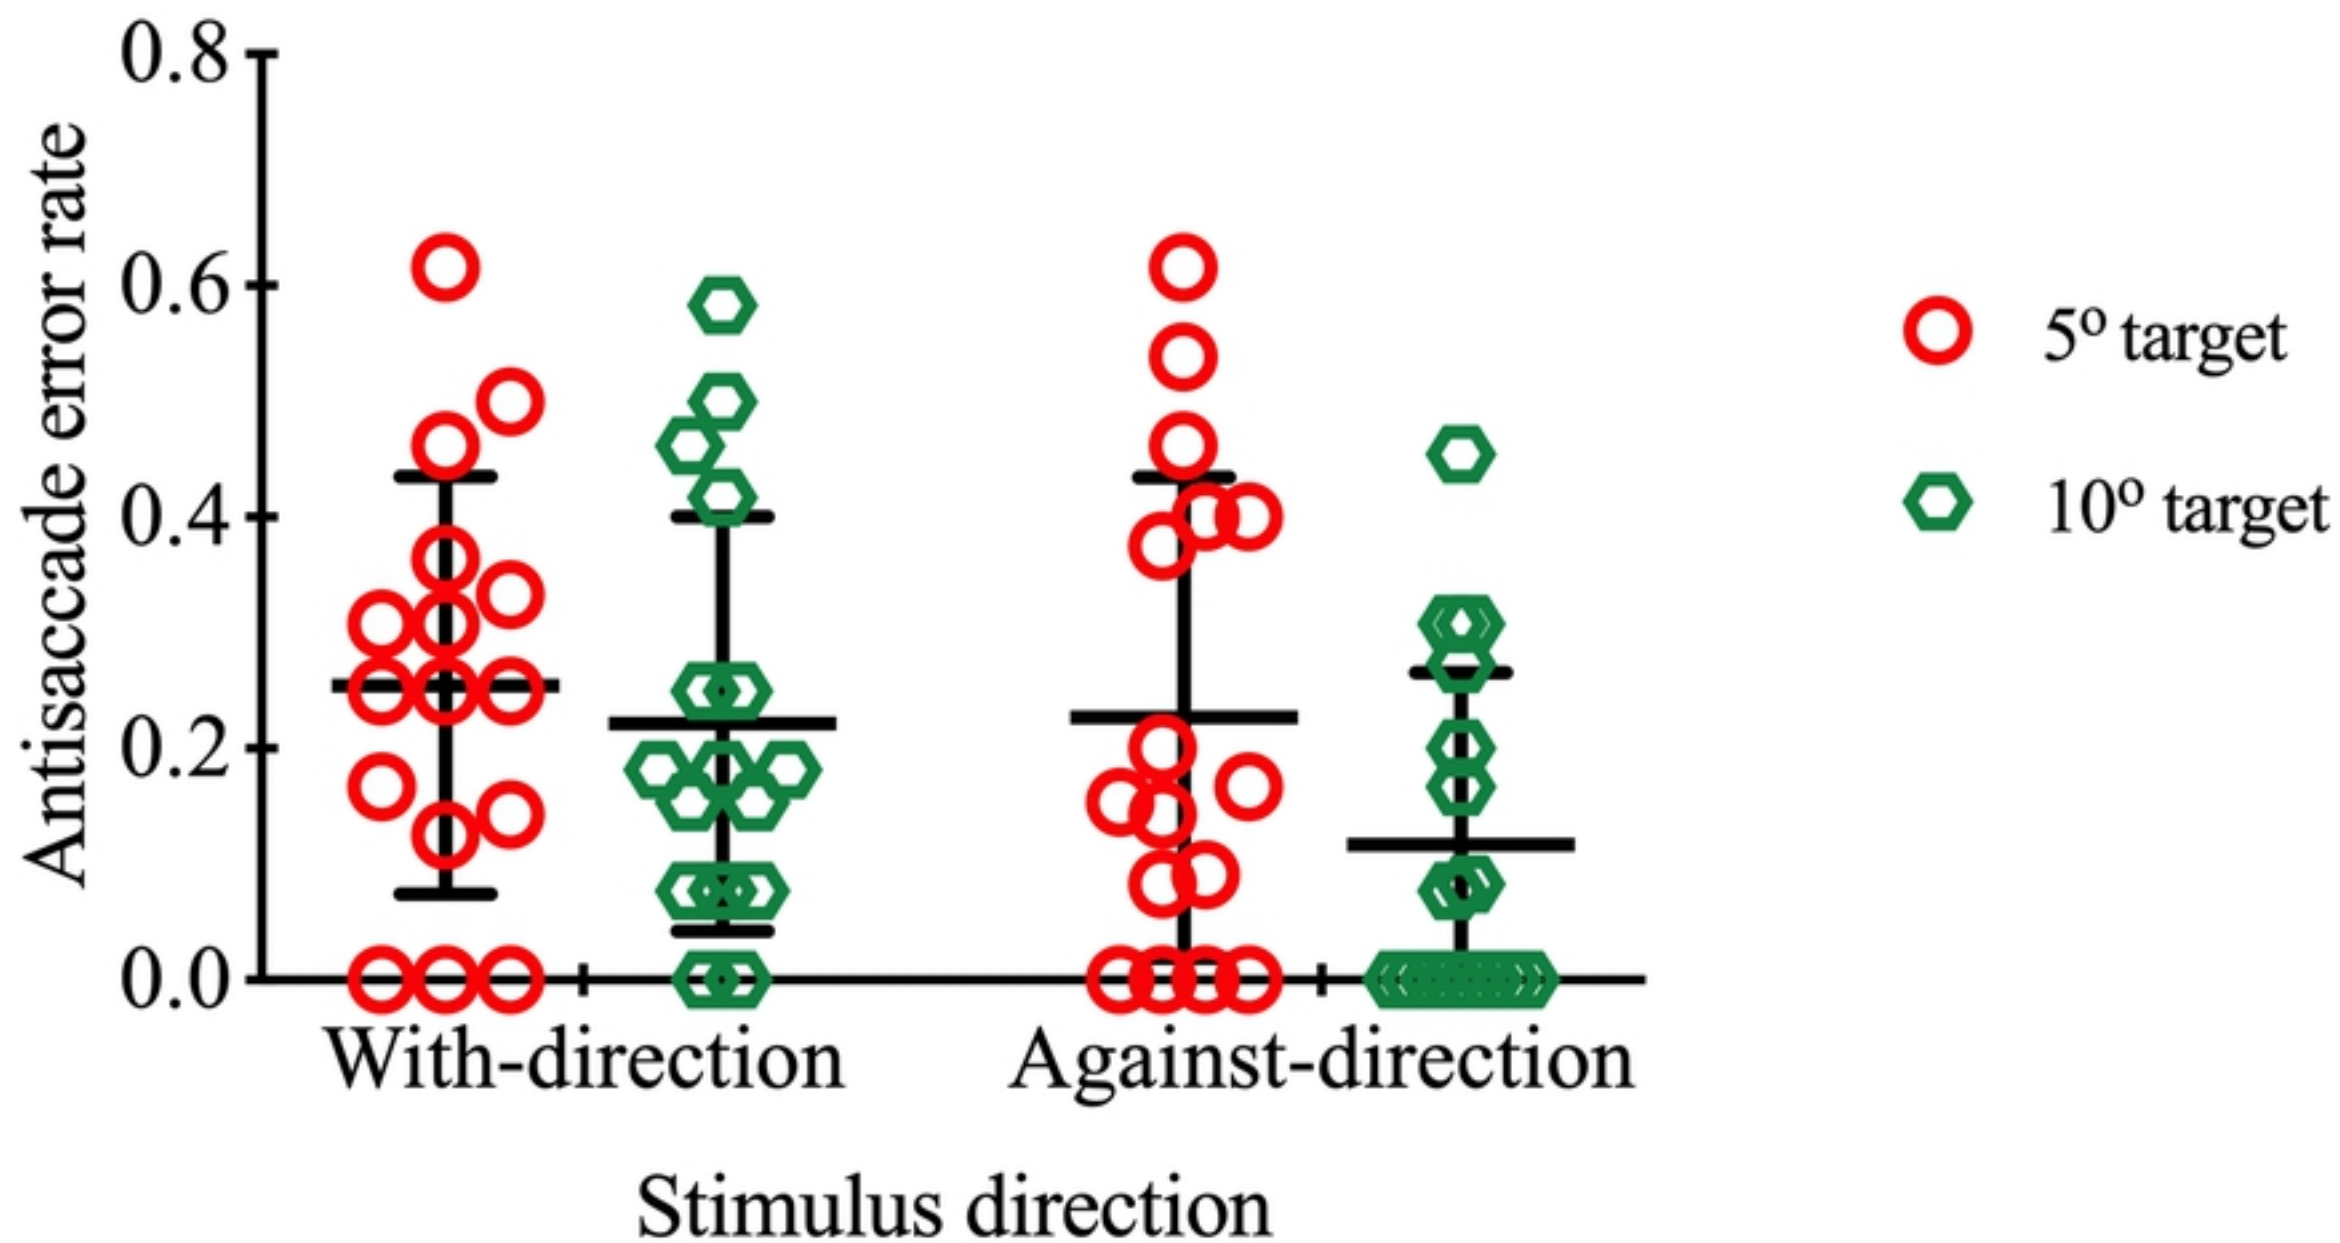

Fig. 2\_left

# Antisaccade error rate in Arabic and Persian (RTL) group

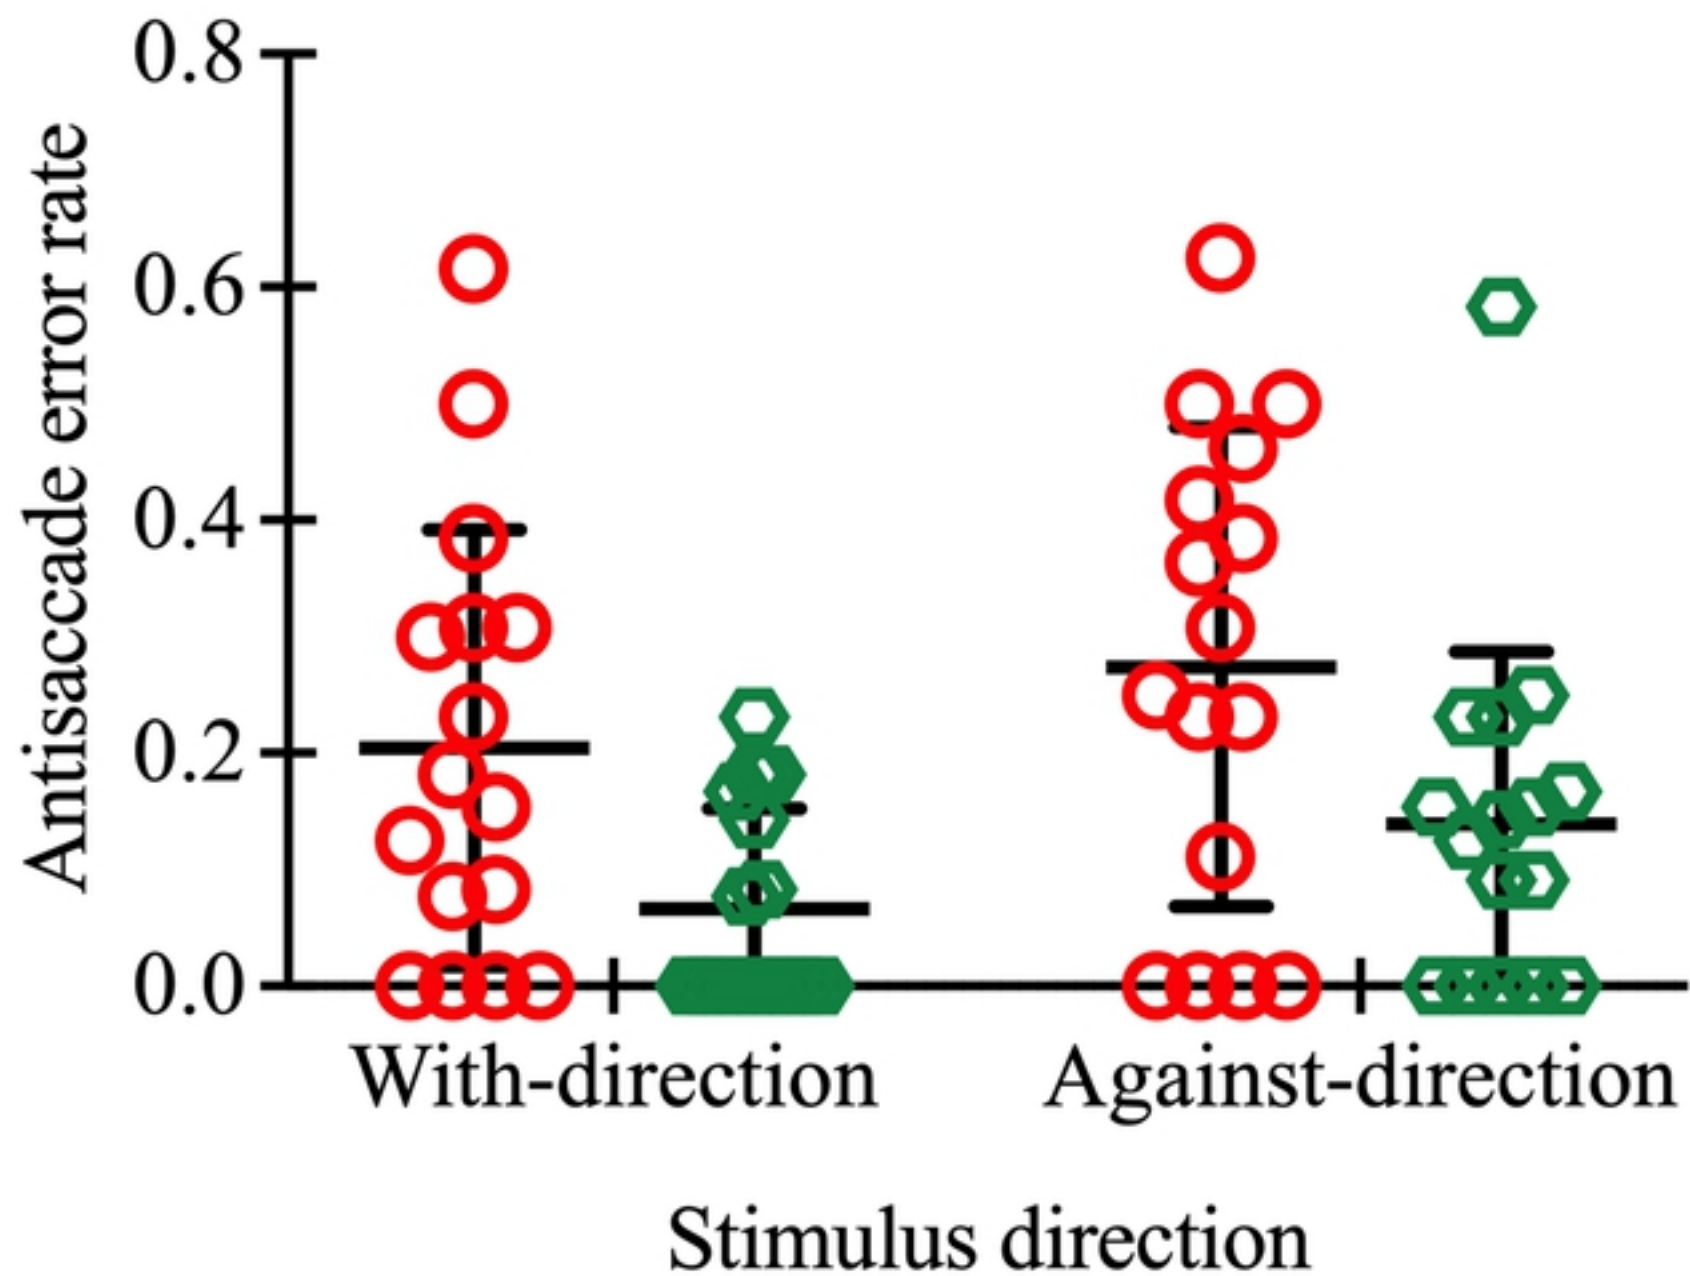

Fig. 2\_right

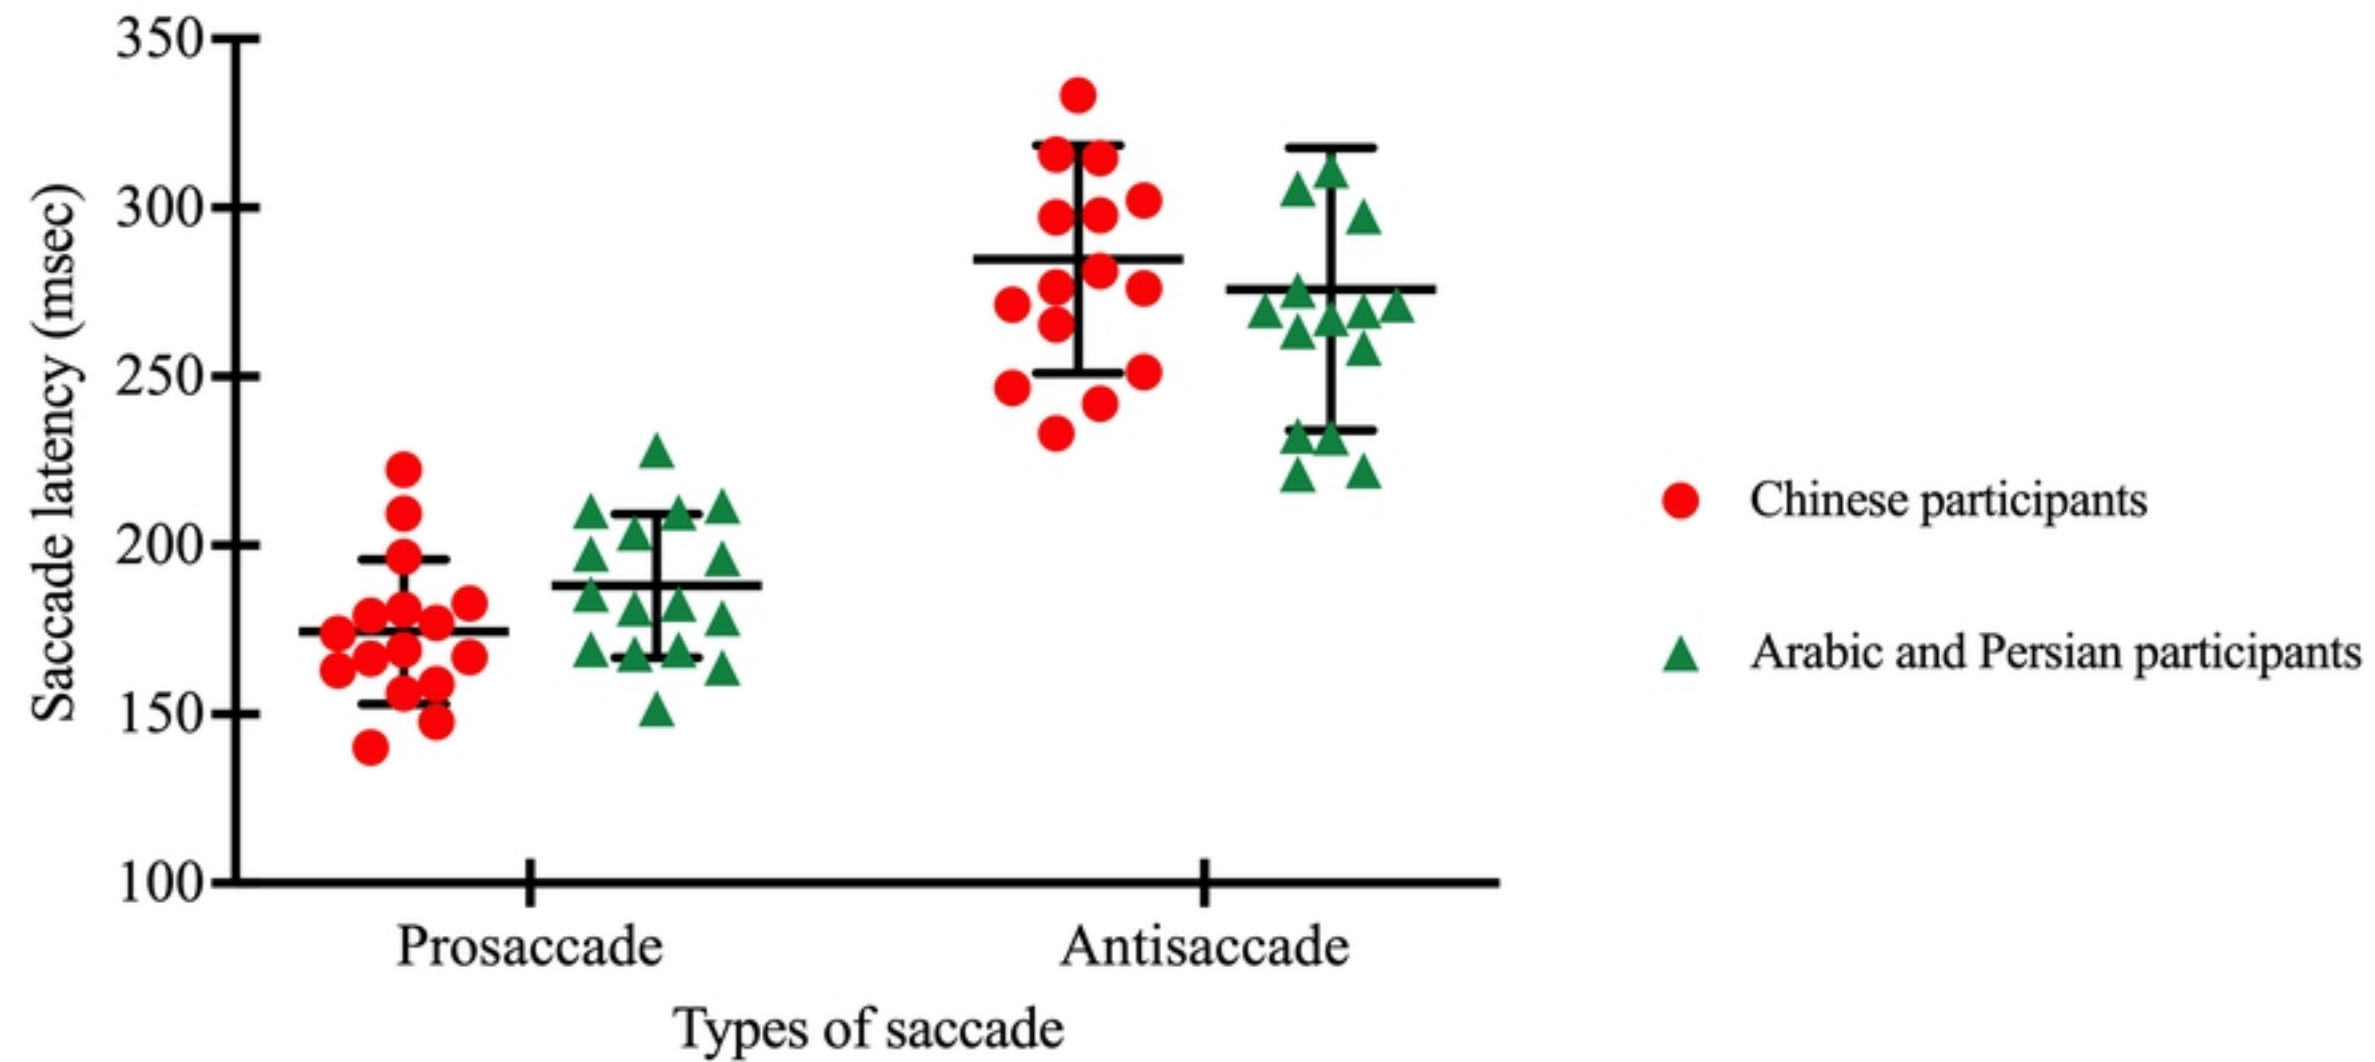

Fig. 3



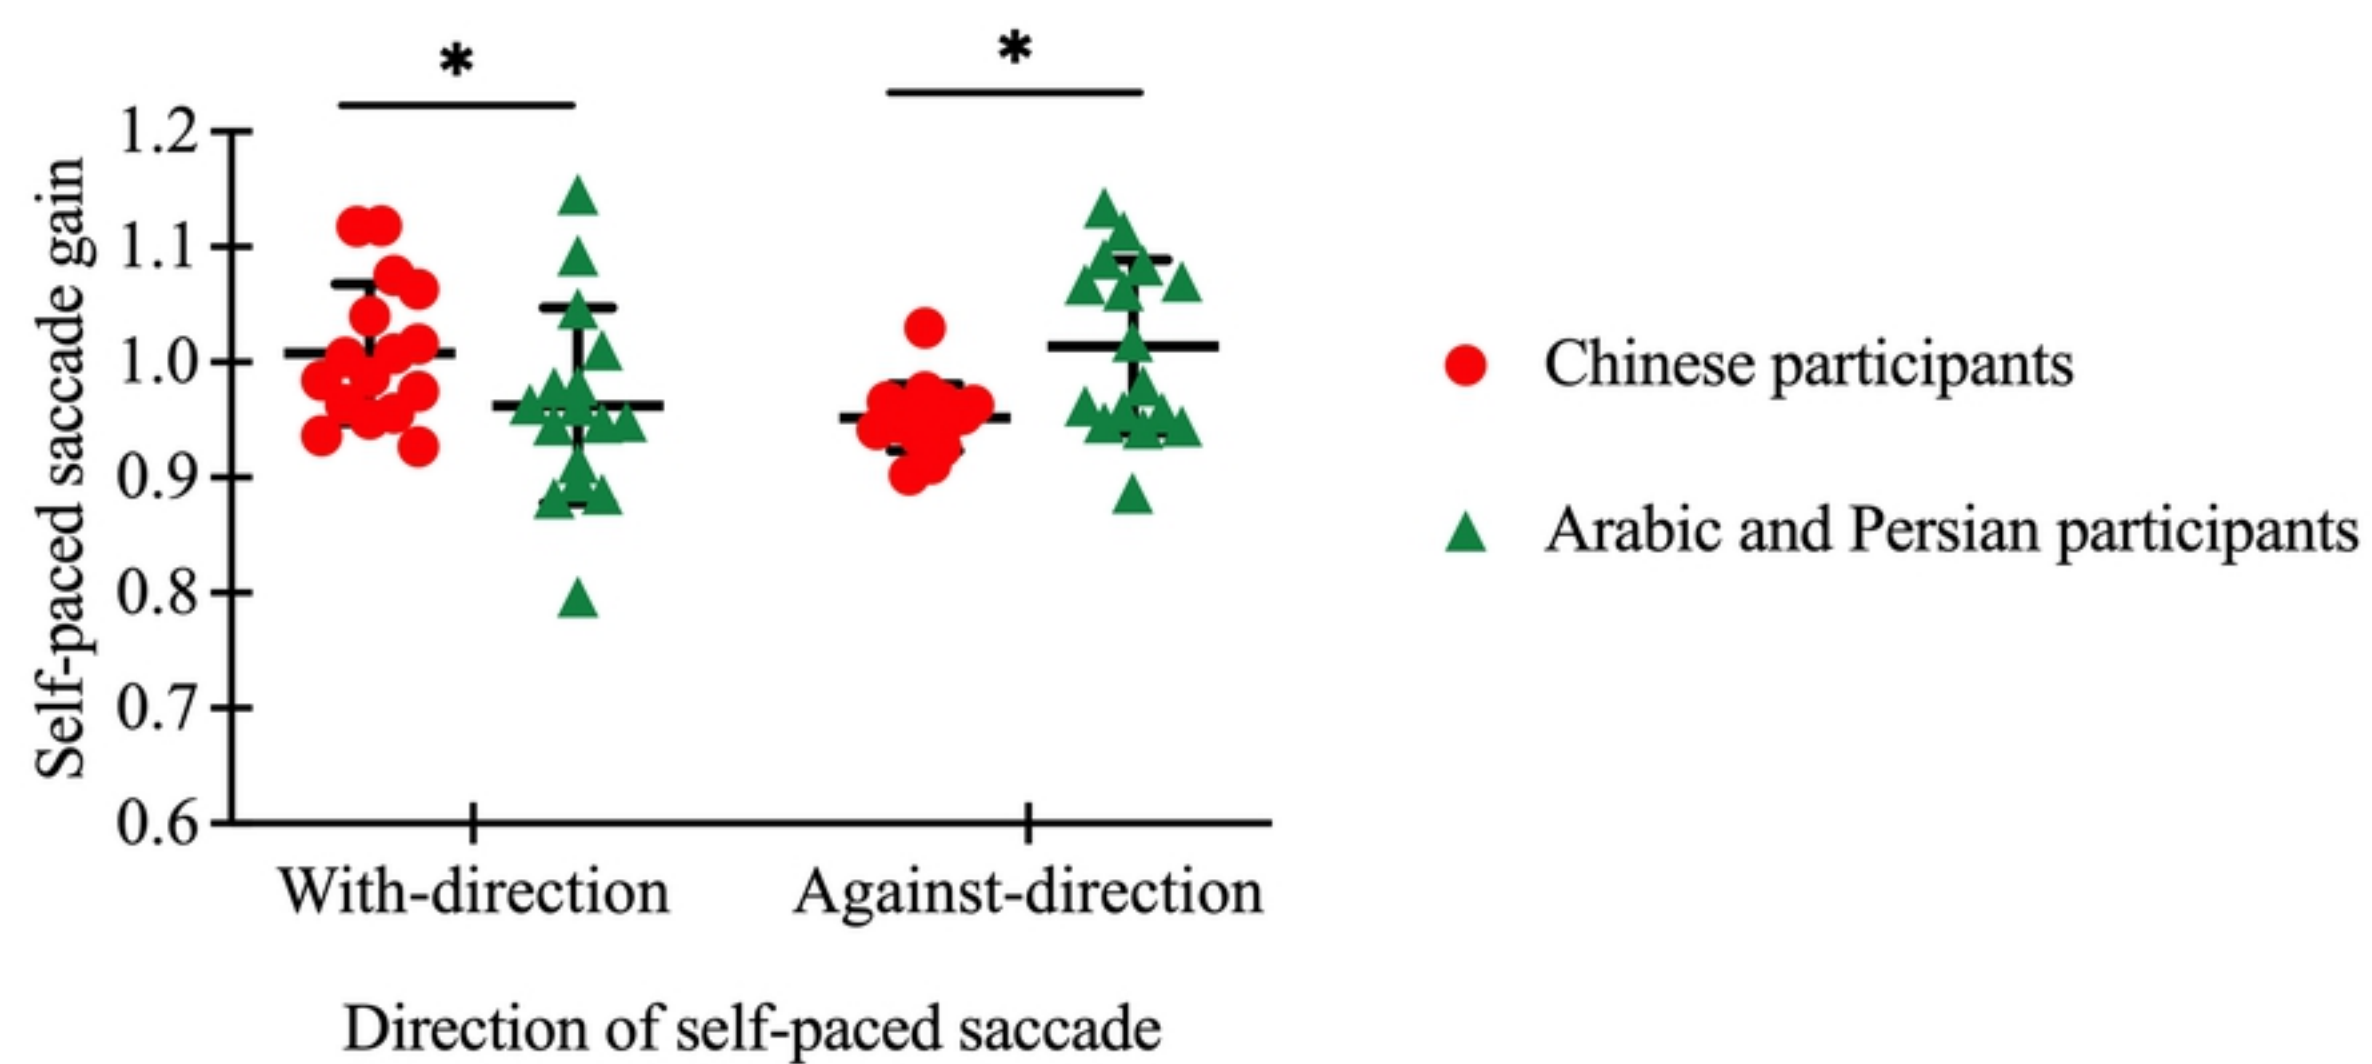

Fig. 4
